# Supplementary material for: Intrinsic ferromagnetism with high temperature, strong anisotropy and controllable magnetization in the CrX (X = P, As) monolayer
Source: Royal Society of Chemistry journal article supplement (doi:10.1039/c9nr10322h), 2020-01-01
Supplement: c9nr10322h1.pdf [file c9nr10322h1.pdf]

## Intrinsic Ferromagnetism with High Temperature, Strong Anisotropy and Controllable Magnetization in CrX (X = P, As) Monolayer

An-Ning Ma, Pei-Ji Wang, and Chang-Wen Zhang\*

School of Physics and Technology, University of Jinan, Jinan, Shandong, 250022, People's Republic of China

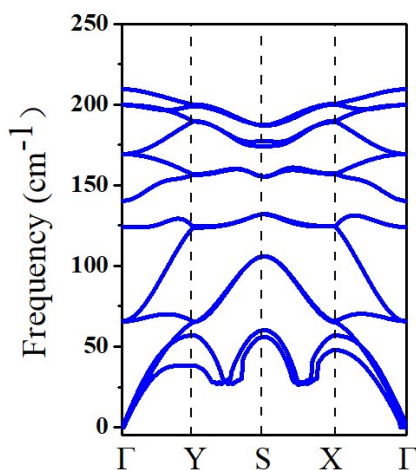

Fig. S1 Calculated phonon dispersion of monolayer CrAs.

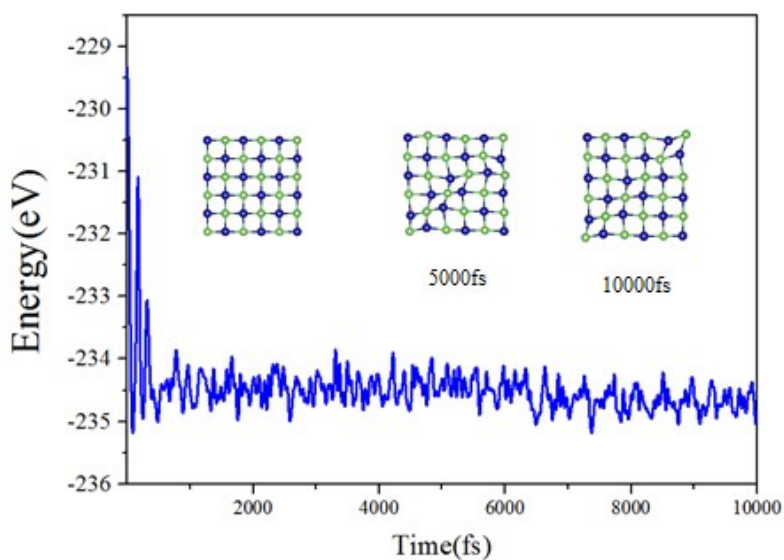

Fig. S2 Evolution of total energy and snapshots of CrAs from AIMD simulations at 0 and 10 ps.

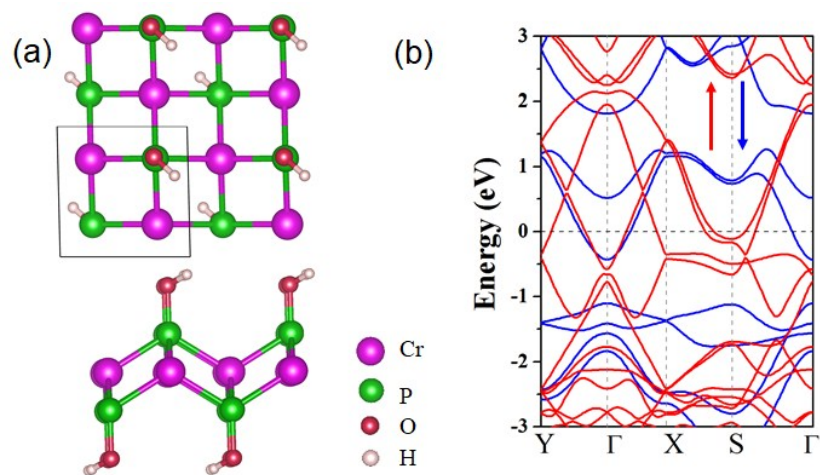

**Fig. S3** (a) Crystal structure of OH functionalized CrP monolayer (b) Spin-polarized electronic band structure for OH functionalized CrP monolayer.
